# Supplementary material for: Adjunctive markers for classification and diagnosis of central nervous system tumors: results of a multi-center neuropathological survey in Korea
Source: PubMed Central journal article supplement — J Pathol Transl Med. 2020 Feb 20;54(2):165–70. doi: 10.4132/jptm.2020.02.04 (PMC7093289; doi:10.4132/jptm.2020.02.04), 2020-02-20
Supplement: jptm-2020-02-04-suppl2.pdf [file jptm-2020-02-04-suppl2.pdf]

|               | A | B | C | D | E | F | G | H | I | J |
|---------------|---|---|---|---|---|---|---|---|---|---|
| BRAF (V600)   |   |   | █ | █ | █ |   |   |   | █ | █ |
| IDH1          |   | █ |   | █ |   |   |   | █ |   |   |
| MGMT          |   | █ |   | █ |   |   |   | █ |   |   |
| 1p/19q        |   | █ |   | █ |   |   |   | █ |   |   |
| IDH2          |   | █ |   |   |   |   |   | █ |   |   |
| NGS           | █ |   |   |   |   |   |   | █ |   |   |
| TERT          |   | █ |   |   |   |   |   |   |   |   |
| BRAF-KIAA1549 | █ |   |   |   |   |   |   |   |   |   |

**A**

|             | A | B | C | D | E | F | G | H | I | J |
|-------------|---|---|---|---|---|---|---|---|---|---|
| IDH1        |   | █ | █ | █ |   |   |   | █ |   |   |
| IDH2        |   | █ | █ |   |   |   |   | █ |   |   |
| BRAF (V600) |   |   | █ |   | █ |   |   | █ |   |   |
| MGMT        |   | █ |   | █ |   |   |   | █ |   |   |
| 1p/19q      |   | █ |   | █ |   |   |   | █ |   |   |
| NGS         |   | █ |   |   |   |   |   | █ |   | █ |
| TERT        |   | █ |   |   |   |   |   |   |   |   |

**B**

**Supplementary Fig. S2.** Molecular markers used in pilocytic astrocytoma (A) and pleomorphic xanthoastrocytoma (B). Alphabet A–J represents respondents. IDH1, isocitrate dehydrogenase 1; MGMT, O<sup>6</sup>-methylguanine–DNA methyltransferase; IDH2, isocitrate dehydrogenase 2; NGS, next-generation sequencing; TERT, telomerase reverse transcriptase.
